# Supplementary material for: Force networks, torque balance and Airy stress in the planar vertex model of a confluent epithelium
Source: Proc Math Phys Eng Sci. 2020 May 13;476(2237):20190716. doi: 10.1098/rspa.2019.0716 (PMC7277128; doi:10.1098/rspa.2019.0716)
Supplement: Data for Fig 1 [file rspa20190716supp1.xlsx]

## Sheet: Cell Centre Coordinates
ID	Cell_centres
0	[ 151. 136.4]
1	[ 203.5 136.83333333]
2	[ 296.42857143 141.42857143]
3	[ 116.66666667 141.5 ]
4	[ 260.16666667 144. ]
5	[ 380.16666667 147.83333333]
6	[ 347. 152.66666667]
7	[ 170.42857143 157.14285714]
8	[ 228.16666667 154.16666667]
9	[ 320.8 156.6]
10	[ 133.16666667 163.16666667]
11	[ 276.4 166. ]
12	[ 250.8 170.6]
13	[ 356.8 172. ]
14	[ 200.16666667 171.5 ]
15	[ 299.5 177.33333333]
16	[ 386.25 182.625]
17	[ 150.2 183. ]
18	[ 330.57142857 183.71428571]
19	[ 232.83333333 185.83333333]
20	[ 176.16666667 191.5 ]
21	[ 354.75 190.5 ]
22	[ 123.4 193. ]
23	[ 266. 199.42857143]
24	[ 209.83333333 202.5 ]
25	[ 406. 203.]
26	[ 147.71428571 215.85714286]
27	[ 301.33333333 213.33333333]
28	[ 183.71428571 220.14285714]
29	[ 344.85714286 215.14285714]
30	[ 242.16666667 220.16666667]
31	[ 375.57142857 232.71428571]
32	[ 216.6 229.8]
33	[ 158.25 235. ]
34	[ 272. 241.42857143]
35	[ 309.16666667 243. ]
36	[ 341.5 250.16666667]
37	[ 201.83333333 252.33333333]
38	[ 167.83333333 252.66666667]
39	[ 362.25 259.5 ]
40	[ 238.85714286 258.42857143]
41	[ 106.2 264. ]
42	[ 135.14285714 257. ]
43	[ 387. 268.14285714]
44	[ 292.16666667 270.66666667]
45	[ 266.2 274.6]
46	[ 322. 274.83333333]
47	[ 182.8 280.2]
48	[ 352.85714286 281.71428571]
49	[ 154.16666667 287.33333333]
50	[ 214. 285.16666667]
51	[ 383.83333333 300.66666667]
52	[ 243.83333333 298.66666667]
53	[ 306.2 297.6]
54	[ 123.57142857 298. ]
55	[ 278.33333333 303.83333333]
56	[ 328.16666667 306.16666667]
57	[ 186.57142857 310.57142857]
58	[ 355.2 313.6]
59	[ 222.83333333 317.5 ]
60	[ 151.33333333 321. ]
61	[ 297.71428571 329.71428571]
62	[ 120. 332.66666667]
63	[ 204.25 335.25]
64	[ 332.5 335.5]
65	[ 257.14285714 337.71428571]
66	[ 374.375 344.375]
67	[ 141.8 350. ]
68	[ 177.85714286 351.85714286]
69	[ 220.71428571 355.14285714]
70	[ 412.83333333 358.16666667]
71	[ 311. 355.2]
72	[ 340.4 360.8]
73	[ 284.83333333 366.66666667]
74	[ 116.83333333 367. ]
75	[ 219.6 382.8]
76	[ 252.42857143 384.57142857]
77	[ 188. 384.71428571]
78	[ 385.16666667 380.66666667]
79	[ 356.66666667 379.83333333]
80	[ 148.14285714 387.42857143]
81	[ 316. 386.]
82	[ 423.25 392.125]
83	[ 234.4 406.6]
84	[ 278. 405.16666667]
85	[ 393.8 408.2]
86	[ 336.2 404.4]
87	[ 182.25 406. ]
88	[ 204.33333333 405.16666667]
89	[ 363.14285714 409.71428571]
90	[ 163.14285714 413.42857143]
91	[ 306. 418.66666667]
92	[ 185.5 425. ]
93	[ 248.42857143 427.14285714]

## Sheet: Vertex Locations
ID	Vertex Locations
0	[225 217]
1	[338 270]
2	[368 199]
3	[382 213]
4	[166 273]
5	[150 263]
6	[377 318]
7	[260 319]
8	[185 439]
9	[298 438]
10	[427 412]
11	[101 133]
12	[182 265]
13	[199 230]
14	[152 153]
15	[204 388]
16	[166 218]
17	[275 388]
18	[352 343]
19	[316 405]
20	[278 258]
21	[113 172]
22	[197 118]
23	[347 267]
24	[219 298]
25	[128 214]
26	[400 133]
27	[167 296]
28	[245 153]
29	[234 201]
30	[201 367]
31	[325 352]
32	[121 279]
33	[262 221]
34	[296 402]
35	[160 195]
36	[400 308]
37	[285 419]
38	[258 413]
39	[144 303]
40	[ 98 154]
41	[159 115]
42	[435 358]
43	[264 295]
44	[357 395]
45	[187 333]
46	[344 165]
47	[175 232]
48	[253 132]
49	[212 300]
50	[143 413]
51	[171 209]
52	[236 449]
53	[434 367]
54	[441 394]
55	[139 199]
56	[232 438]
57	[276 221]
58	[191 399]
59	[114 315]
60	[307 158]
61	[401 255]
62	[135 284]
63	[200 272]
64	[291 236]
65	[196 438]
66	[295 158]
67	[374 367]
68	[191 413]
69	[222 334]
70	[ 98 366]
71	[360 161]
72	[382 133]
73	[253 241]
74	[442 375]
75	[111 284]
76	[294 312]
77	[225 246]
78	[217 399]
79	[260 439]
80	[388 320]
81	[218 119]
82	[165 175]
83	[307 262]
84	[122 350]
85	[350 136]
86	[201 356]
87	[343 181]
88	[237 389]
89	[419 412]
90	[163 305]
91	[126 385]
92	[322 367]
93	[129 236]
94	[335 290]
95	[232 278]
96	[172 377]
97	[192 195]
98	[322 290]
99	[259 259]
100	[206 371]
101	[157 339]
102	[153 166]
103	[276 133]
104	[395 425]
105	[322 258]
106	[347 417]
107	[328 230]
108	[207 318]
109	[363 360]
110	[198 420]
111	[110 384]
112	[322 218]
113	[138 329]
114	[150 424]
115	[374 279]
116	[423 413]
117	[256 413]
118	[136 129]
119	[169 393]
120	[118 125]
121	[233 170]
122	[340 385]
123	[141 240]
124	[352 338]
125	[178 173]
126	[233 239]
127	[191 153]
128	[342 200]
129	[282 146]
130	[413 156]
131	[151 250]
132	[102 330]
133	[191 202]
134	[169 426]
135	[378 399]
136	[369 272]
137	[234 367]
138	[308 279]
139	[277 326]
140	[340 382]
141	[250 188]
142	[171 140]
143	[409 180]
144	[134 180]
145	[246 202]
146	[110 163]
147	[156 364]
148	[264 160]
149	[248 278]
150	[201 217]
151	[391 221]
152	[342 298]
153	[405 147]
154	[366 182]
155	[171 327]
156	[304 370]
157	[225 412]
158	[136 368]
159	[164 426]
160	[334 162]
161	[365 296]
162	[313 142]
163	[ 89 264]
164	[358 242]
165	[419 341]
166	[109 349]
167	[375 257]
168	[105 298]
169	[396 345]
170	[135 412]
171	[310 195]
172	[310 340]
173	[361 426]
174	[174 414]
175	[237 331]
176	[425 190]
177	[371 171]
178	[241 140]
179	[218 171]
180	[294 391]
181	[119 247]
182	[237 420]
183	[423 211]
184	[ 91 246]
185	[262 182]
186	[199 295]
187	[319 171]
188	[399 283]
189	[222 268]
190	[285 254]
191	[331 150]
192	[363 142]
193	[226 137]
194	[400 390]
195	[103 200]
196	[135 323]
197	[294 347]
198	[206 154]
199	[316 322]
200	[321 420]
201	[290 122]
202	[293 288]
203	[183 233]
204	[263 362]
205	[322 212]
206	[183 140]
207	[279 184]
208	[216 183]
209	[366 390]
210	[356 426]
211	[137 145]
212	[260 418]
213	[340 318]
214	[244 360]
215	[279 342]
216	[312 131]
217	[393 364]
218	[400 374]
219	[282 283]
220	[376 213]
221	[320 428]
222	[240 324]
223	[356 234]
224	[287 198]
225	[314 319]
226	[391 249]
227	[400 282]
228	[377 415]
229	[173 398]

## Sheet: Edge Lengths
ID	Edge Lengths
0	15.2643
1	7.61577
2	17.1172
3	17.4929
4	25.02
5	17.088
6	30.0832
7	18.3848
8	8.06226
9	18.0278
10	26.1725
11	32.45
12	18.1108
13	33.3017
14	1.41421
15	19.7231
16	6
17	23.0217
18	20.8087
19	24.7588
20	12
21	17.8885
22	30.6105
23	28.2843
24	22.0907
25	13.0384
26	13.4164
27	14.1421
28	16.6433
29	28.6356
30	25.4951
31	19.2354
32	15
33	31.8277
34	12.0416
35	18.3576
36	24.0208
37	19.2094
38	14
39	20.8087
40	18.0278
41	30
42	16.2788
43	26.9258
44	19.3132
45	15.5242
46	22.561
47	20.6155
48	14.4222
49	14.8661
50	17.0294
51	19.2354
52	9.89949
53	13.1529
54	21.6333
55	25
56	24.3311
57	12.083
58	14.4222
59	20.0998
60	13
61	4.12311
62	19.0263
63	18.2483
64	14.3178
65	27.2947
66	19.2354
67	16.1245
68	14.5602
69	20
70	26.0768
71	26.2488
72	12
73	10.6301
74	21.6333
75	25.6125
76	23.4307
77	34.7131
78	15.0333
79	23.4094
80	21.3776
81	16.4924
82	11.1803
83	20.2485
84	23.0868
85	14
86	15
87	6.7082
88	18.6011
89	15.2315
90	25.0599
91	14.1421
92	19.0263
93	12.083
94	8.60233
95	25.807
96	16
97	17.0294
98	24.1661
99	31.241
100	23.0217
101	23.6008
102	13.1529
103	32.0156
104	20.2485
105	25.0799
106	32.0624
107	29.7321
108	5
109	3
110	26.0768
111	21.0238
112	18
113	22.0227
114	23.6008
115	14.8661
116	7.07107
117	22.4722
118	17
119	15.8114
120	12.3693
121	22.8035
122	23.4094
123	26.2488
124	16.0312
125	22.4722
126	23.4094
127	21.1896
128	23.7697
129	29
130	23.8537
131	17.6918
132	17.1172
133	19.6977
134	26.8328
135	16.1555
136	19.7231
137	16.0312
138	21.0238
139	13.0384
140	19.2094
141	10.4403
142	30.6757
143	22.8035
144	25.02
145	33.4215
146	18.9737
147	16.0312
148	13.0384
149	27.313
150	32.8024
151	12.6491
152	7.28011
153	22.8035
154	35.8469
155	20.2485
156	15.0333
157	17.6918
158	23.3452
159	9.84886
160	3.60555
161	16.0312
162	28.6356
163	20.6155
164	4.12311
165	22.2036
166	15
167	12.2066
168	33.5261
169	5.38516
170	14.8661
171	21.0238
172	12.7279
173	19.6977
174	22.0227
175	13.9284
176	17.088
177	20.5913
178	28
179	13.6015
180	25.02
181	6
182	22.2036
183	19.2354
184	19.105
185	5
186	16.1245
187	17.0294
188	30.5287
189	15.2971
190	28.6531
191	20.2237
192	16
193	29.8329
194	29.0689
195	19.6469
196	24.3311
197	21.9317
198	13.0384
199	11.3137
200	25.632
201	24.3516
202	8.06226
203	26.0192
204	24.3311
205	27.0185
206	24.1661
207	20.8087
208	12.1655
209	23.0217
210	20.3961
211	16.9706
212	10.6301
213	23.3238
214	16.2788
215	23.0217
216	14.1421
217	25.318
218	18.1108
219	30.5287
220	18.7883
221	28.4605
222	8.06226
223	9.48683
224	17.8885
225	14.8661
226	42.638
227	21.4709
228	23.0217
229	20.6155
230	18.6815
231	27.7308
232	21.9317
233	23.3238
234	19.2354
235	10.2956
236	21
237	22.3607
238	28.0179
239	20.2485
240	29.7321
241	18.4391
242	23.0217
243	8.24621
244	22.6716
245	11
246	26.9258
247	9.48683
248	23.2594
249	17.1172
250	16.0312
251	21.095
252	15.2643
253	8.06226
254	2
255	13
256	25.4558
257	23.1948
258	6.40312
259	12.2066
260	15.2971
261	13.4164
262	17.8045
263	11.6619
264	17.4929
265	21.9545
266	23.8537
267	6.40312
268	18.4391
269	30.2324
270	32.0156
271	15.2971
272	19.105
273	17.4642
274	26
275	19.0263
276	24.8395
277	20.2485
278	18.868
279	12.0416
280	21.1896
281	14.3178
282	13.0384
283	30.4138
284	23.7697
285	32.0156
286	21.2132
287	25.318
288	22.3607
289	26.4008
290	28.4605
291	16.1245
292	11.7047
293	20.2237
294	17.8045
295	9.05539
296	24
297	28.2843
298	19.4165
299	23.3452
300	15.8114
301	17.8045
302	5
303	11.1803
304	41.6173
305	21.2132
306	18.9737
307	11.0454
308	23.3452
309	20.6155
310	19.2354
311	18.9737
312	11.1803
313	11.0454
314	12.0416
315	20.0998
316	21.9317
317	28.1603
318	18.6815
319	17.0294
320	10.2956
321	20.2485
322	18.868

## Sheet: Link Lengths_IntersectionAngles
Link Lengths	Intersection Angles
30.1008	0.971506
39.8216	1.44327
35.009	1.38629
28.8213	1.37627
28.7078	1.37276
23.578	1.46812
39.9619	1.40249
22.0487	1.36246
27.2341	1.50795
21.8506	1.35227
31.9751	1.40792
51.2149	1.36075
31.5928	1.45638
41.6192	1.39359
23.5554	1.51722
37.2263	1.41919
28.4655	1.35551
35.1843	1.52446
26.01	1.30235
34.4791	1.5556
45.2751	1.37169
31.9052	1.54626
29.4816	1.52762
33.1181	1.56377
37.9709	1.49961
36.4529	1.56557
25.0374	1.5148
36.845	1.55848
28.5553	1.39238
29.1606	1.41648
42.4264	1.4289
32.9309	1.51044
31.5194	1.56472
20.0985	1.42433
36.9395	1.24347
33.7464	1.34245
34.3228	1.44819
24.1185	1.39424
27.3225	1.49943
42.6016	1.50285
19.276	1.46014
39.1017	1.55174
27.3506	1.54494
34.833	1.55796
31.6513	1.37621
30.3573	1.54891
29.6517	1.55231
31.308	1.49042
38.4048	1.55741
25.1742	1.48798
25.1127	1.34977
31.2032	1.56658
37.8622	1.43837
40.1304	1.50688
35.8449	1.46008
31.4435	1.54535
36.0359	1.48546
36.2626	1.5128
40.0625	1.43786
35.0771	1.49626
35.5201	1.47621
34.8266	1.54151
27.3213	1.55923
32.951	1.30707
21.6753	1.34663
38.1807	1.5621
28.201	1.55638
31.9717	1.5574
22.0991	1.53308
32.8297	1.55043
33.4348	1.46359
33.3711	1.44903
31.4188	1.49571
36.5076	1.53436
33.6747	1.34511
35.9359	1.53932
36.7412	1.32889
35.8053	1.1804
40.5446	1.44775
26.174	1.54243
27.462	1.33891
27.324	1.43354
26.1437	1.49623
34.2743	1.43782
30.6047	1.47849
28.5688	1.56791
29.7773	1.39592
41.1316	1.4203
31.241	1.44279
32.4013	1.46388
32.3333	1.52464
35.4181	1.3969
31.3913	1.5232
32.1634	1.47304
39.1331	1.55714
26.4936	1.47483
36.7489	1.50976
30.1478	1.31703
20.5004	1.26241
34.8501	1.30948
32.4722	1.36858
29.6206	1.49177
35.3853	1.32943
32.7457	1.41936
31.7001	1.50927
31.6579	1.39318
32.4722	1.40942
26.2157	1.52626
37.3847	1.52441
28.7256	1.08834
37.7457	1.48729
35.1262	1.37557
34.3871	1.53815
27.3408	1.54545
36.1049	1.55931
28.2081	1.51915
37.2485	1.41861
39.6343	1.46724
22.7524	1.56262
30.0167	1.43838
43.0206	1.54559
33.5182	1.55918
30.2049	1.50755
30.6834	1.30288
24.8759	1.32463
32.0087	1.49105
29.7248	1.5443
39.8758	1.3669
38.4946	1.50058
30.6945	1.45902
37.0223	1.49842
32.8763	1.38136
43.2647	1.35876
36.8432	1.3122
33.6159	1.54004
37.3862	1.11429
42.1954	1.42004
33.5762	1.56167
43.5614	1.52924
37.5222	1.54316
36.3141	1.50862
33.7857	1.54988
42.8052	1.36195
41.3526	1.50047
30.1229	1.37327
26.9408	1.54234
29.9286	1.56162
34.163	1.42262
39.7698	1.27854
40.3831	1.3614
33.5516	1.35808
28.6049	1.47099
34.8847	1.5543
25.6983	1.56148
32.9764	1.36224
31.7199	1.41457
28.5122	1.26529
26.5545	1.1506
27.97	1.55745
35.6729	1.32246
29.5085	1.37009
37.9622	1.54127
34.7497	1.50907
34.523	1.457
39.9495	1.31745
18.6132	1.50389
26.2629	1.56247
25.7304	1.47526
26.5047	1.55171
36.194	1.24092
31.3382	1.53654
28.3761	1.45555
30.5268	1.40393
28.4207	1.41815
41.2536	1.48727
36.9179	1.48864
36.6346	1.37446
31.542	1.34375
33.517	1.26948
30.5747	1.27713
28.0264	1.47811
31.0846	1.44575
38.2812	1.34239
29.9155	1.30933
42.9829	1.49428
31.183	1.55595
33.5296	1.54699
36.6761	1.45999
32.4695	1.44293
34.7101	1.48575
38.8097	1.56987
35.5185	1.48614
42.7589	1.47711
31.9344	1.37647
28.4038	1.41247
36.0467	1.49198
44.0987	1.40972
35.6608	1.49875
32.5903	1.54923
30.37	1.51071
31.7671	1.5615
33.0224	1.4442
37.9788	1.38826
40.69	1.5694
32.8339	1.48995
34.0016	1.52975
37.7025	1.31717
47.0937	1.56619
28.7408	1.50266
31.5927	1.55462
37.737	1.44681
42.5304	1.50016
33.2165	1.49245
36.353	1.20918
25.8224	1.45352
28.8551	1.48633
36.2599	1.45327
32.6776	1.5092
35.0151	1.39578
27.8511	1.55012
52.6382	1.42405
31.615	1.50028
37.4541	1.52876
28.1261	1.32783
27.6796	1.38863
33.4003	1.45122
27.7121	1.51151
42.5601	1.2835
35.3195	1.12923
40.6176	1.54924
37.1999	1.2913
32.8553	1.50391
46.3494	1.55719
40.8565	1.38307
35.2636	1.41386
44.72	1.53754
35.5793	1.22222
28.0367	1.40213
36.0517	1.30179
27.0802	1.46747
36.2542	1.18219
37.2633	1.38772
